# Supplementary material for: Na6Si3S8O: the first example of a sulfide silicate exhibiting unusual tri-polymerized [Si3S8O]6−units without S–O bonds
Source: Royal Society of Chemistry journal article supplement (doi:10.1039/c7dt03125d), 2017-01-01
Supplement: c7dt03125d1.pdf [file c7dt03125d1.pdf]

## Electronic Supplementary Information

### **Na<sub>6</sub>Si<sub>3</sub>S<sub>8</sub>O: first example of sulfide silicate exhibiting unusual tri-polymerized [Si<sub>3</sub>S<sub>8</sub>O]<sup>6-</sup> units without the S–O bonds**

Kui Wu, Zhihua Yang, Shilie Pan\*

*Key Laboratory of Functional Materials and Devices for Special Environments of  
CAS; Xinjiang Key Laboratory of Electronic Information Materials and Devices;  
Xinjiang Technical Institute of Physics & Chemistry of CAS, 40-1 South Beijing Road,  
Urumqi 830011, China*

*To whom correspondence should be addressed :*

*E-mail: slpan@ms.xjb.ac.cn (Shilie Pan).*

## **Experimental Section**

### **Synthesis**

All starting reactants with high purities (4N) were commercially purchased and used without further refinement. An Ar-filled glovebox was used to avoid the oxidation of Na metals. A mixture of Na, Si, and S with the molar ratio of 9 : 4 : 12, and additional 1mmol Na<sub>2</sub>CO<sub>3</sub> as the flux. Firstly, the mixture was filled into a graphite crucible in an vacuum-sealed quartz tube, then put the tube into a furnace with the following procedure: heated to 1073 K within 2 days and left at this temperature about 4 days, then slowly cooled to 573 K with 6 days, finally rapidly down to room temperature. The products were carefully washed with N,N-dimethylformamide (DMF) to remove the Na<sub>2</sub>CO<sub>3</sub> flux and other byproducts. Colorless transparent single-crystals were found and the yield is about 90 %, and this compound was stable in air after several months.

### **Structural Refinement and Crystal Data**

High quality single-crystal was carefully picked and used for data collections with a Bruker SMART APEX II 4K CCD diffractometer using Mo K $\alpha$  radiation ( $\lambda$  = 0.71073 Å) at 296 K. The structure was solved by direct method and refined using the SHELXTL program package.<sup>1</sup> Multi-scan method was used for absorption correction.<sup>2</sup> Rational anisotropic thermal parameters for all atoms were obtained by the anisotropic refinement and extinction correction. PLATON was also used to check

the final structures and no other symmetries were found. Energy-dispersive X-ray (EDX) equipped Hitachi S-4800 SEM was also used to analyze the element composition and proportion. Measured results ensure the presence of Na, Si, S and O with the molar ratio about 6 : 3 : 8 : 1, and no other elements were detected, which is consistent with the result from the X-ray structure determination. Crystal data and structure refinements were shown in Table S1, atomic coordinates and isotropic displacement parameters were shown in Table S2.

#### **Powder XRD Characterization**

Powder X-ray diffraction (XRD) analysis was measured on a Bruker D2 X-ray diffractometer with Cu K $\alpha$  radiation ( $\lambda = 1.5418 \text{ \AA}$ ) at room temperature. The  $2\theta$  range was  $10\text{--}70^\circ$  with a step size of  $0.02^\circ$  and a fixed counting time of 1s/step. The simulated pattern was obtained by the Mercury program and single-crystal reflection data.

#### **UV–Vis–Near-IR (NIR) Diffuse-Reflectance Spectroscopy**

Diffuse-reflectance spectrum was measured by Shimadzu SolidSpec-3700DUV spectrophotometer at the wavelength range from 190 to 2600 nm.

#### **IR Spectroscopy**

As for IR test, single-crystals were picked and mixed with KBr powder, then performed on a Shimadzu IRAffinity-1 Fourier transform infrared spectrometer in the wavenumber range from 400 to  $4000 \text{ cm}^{-1}$ .

#### **Raman Spectroscopy**

Raman spectrum was measured on a LABRAM HR Evolution spectrometer using 532 nm radiations at an integration time of 5 s. The laser power of 50 mW with beam diameter about  $35 \text{ }\mu\text{m}$  was used.

#### **Computational Description**

In order to further investigate the relationship of structure–property, the electronic structure of title compound was studied by density functional theory (DFT) based on ab initio calculations.<sup>3</sup> The exchange-correlation potential was calculated using Perdew–Burke–Ernzerhof (PBE) functional within the generalized gradient

approximation (GGA) with the scheme.<sup>4</sup> The following orbital electrons were treated as valence electrons, Na:  $2s^2 2p^6 3s^1$ , Si:  $3s^2 3p^2$ , S:  $3s^2 3p^4$  O:  $2s^2 2p^4$ . To achieve energy convergence, a plane-wave basis set energy cutoff was 830.0 eV within normal-conserving pseudo-potential (NCP),<sup>5</sup> and the Monkhorst–Pack scheme was  $4 \times 2 \times 2$  in the Brillouin Zone (BZ) of the primitive cell are chosen.

**Table S1** Crystal data and structure refinement for Na<sub>6</sub>Si<sub>3</sub>S<sub>8</sub>O.

| Empirical formula                                                                                                      | Na <sub>6</sub> Si <sub>3</sub> S <sub>8</sub> O |
|------------------------------------------------------------------------------------------------------------------------|--------------------------------------------------|
| Formula weight                                                                                                         | 494.69                                           |
| Temperature                                                                                                            | 296 (2) K                                        |
| Crystal system                                                                                                         | monoclinic                                       |
| Space group                                                                                                            | <i>P</i> 2 <sub>1</sub> / <i>n</i>               |
| Unit cell dimensions                                                                                                   | <i>a</i> = 6.8006(8) Å                           |
|                                                                                                                        | <i>b</i> = 14.3414(18) Å                         |
|                                                                                                                        | <i>c</i> = 16.207(2) Å                           |
|                                                                                                                        | $\beta$ = 90.561(8) <sup>o</sup>                 |
| <i>Z</i> , <i>V</i>                                                                                                    | 4, 1580.6(3) Å <sup>3</sup>                      |
| Density (calculated)                                                                                                   | 2.079 g/cm <sup>3</sup>                          |
| Absorption coefficient                                                                                                 | 1.497 mm <sup>-1</sup>                           |
| Crystal size                                                                                                           | 0.107×0.124× 0.157 mm <sup>3</sup>               |
| Completeness to theta = 27.51                                                                                          | 99.9 %                                           |
| Goodness-of-fit on <i>F</i> <sup>2</sup>                                                                               | 1.024                                            |
| Final <i>R</i> indices [ <i>F</i> <sub>o</sub> <sup>2</sup> > 2σ( <i>F</i> <sub>o</sub> <sup>2</sup> )] <sup>[a]</sup> | <i>R</i> <sub>I</sub> =0.0368                    |
|                                                                                                                        | <i>wR</i> <sub>2</sub> = 0.0611                  |
|                                                                                                                        | <i>R</i> <sub>I</sub> =0.0752                    |
| R indices (all data) <sup>[a]</sup>                                                                                    | <i>wR</i> <sub>2</sub> = 0.0835                  |
|                                                                                                                        |                                                  |
| Largest diff. peak and hole                                                                                            | 0.861 and −0.749 e Å <sup>-3</sup>               |

<sup>[a]</sup>*R*<sub>1</sub> =  $F_o - F_c / F_o$  and *wR*<sub>2</sub> = [*w* (*F*<sub>o</sub><sup>2</sup> − *F*<sub>c</sub><sup>2</sup>)<sup>2</sup> / *wF*<sub>o</sub><sup>4</sup>]<sup>1/2</sup> for *F*<sub>o</sub><sup>2</sup> > 2σ (*F*<sub>o</sub><sup>2</sup>)

**Table S2** Atomic coordinates, isotropic displacement parameters, bond valence sums and global instability index (GII) for Na<sub>6</sub>Si<sub>3</sub>S<sub>8</sub>O.

| Atom       | <i>x</i> | <i>y</i> | <i>z</i> | <i>U</i> <sub>eq</sub> | <i>BVS</i>   |
|------------|----------|----------|----------|------------------------|--------------|
| Na1        | 4463(2)  | 5009(1)  | 7918(1)  | 27(1)                  | 1.364        |
| Na2        | 7465(2)  | 5625(1)  | 4722(1)  | 30(1)                  | 1.014        |
| Na3        | -765(2)  | 5765(1)  | 9119(1)  | 32(1)                  | 1.069        |
| Na4        | 7805(2)  | 6860(1)  | 6731(1)  | 34(1)                  | 1.068        |
| Na5        | 9700(2)  | 8296(1)  | 5127(1)  | 36(1)                  | 1.017        |
| Na6        | 7917(2)  | 8488(1)  | 8616(1)  | 44(1)                  | 0.772        |
| Si1        | 3197(1)  | 6436(1)  | 6243(1)  | 15(1)                  | 4.099        |
| Si2        | 4570(1)  | 8538(1)  | 6509(1)  | 17(1)                  | 4.148        |
| Si3        | 3143(1)  | 7331(1)  | 8228(1)  | 18(1)                  | 4.115        |
| S1         | 1530(1)  | 6415(1)  | 7391(1)  | 19(1)                  | 2.189        |
| S2         | 5951(1)  | 6774(1)  | 8407(1)  | 21(1)                  | 2.128        |
| S3         | 5340(1)  | 5390(1)  | 6229(1)  | 20(1)                  | 2.172        |
| S4         | 2864(1)  | 9387(1)  | 5746(1)  | 22(1)                  | 2.109        |
| S5         | 1109(1)  | 6358(1)  | 5308(1)  | 25(1)                  | 1.917        |
| S6         | 1400(1)  | 7476(1)  | 9262(1)  | 25(1)                  | 1.949        |
| S7         | 3372(1)  | 8707(1)  | 7738(1)  | 29(1)                  | 2.071        |
| S8         | 7548(1)  | 8844(1)  | 6577(1)  | 30(1)                  | 2.013        |
| O1         | 4417(3)  | 7423(2)  | 6277(1)  | 21(1)                  | 2.114        |
| <b>GII</b> |          |          |          |                        | <b>0.131</b> |

GII can be derived from the bond valence concepts, which represent the tension of lattice parameters and always used to evaluate the rationality of structure. While the value of GII is less than 0.05 vu (valence unit), the tension of structure is not proper, whereas the value of GII is larger than 0.2 vu, its structure is not stable. Thus, the value of GII in a reliable structure should be limited at 0.05–0.2 in general. **As for Na<sub>6</sub>Si<sub>3</sub>S<sub>8</sub>O, calculated GII value is 0.131 vu, which illustrates that its crystal structure is reasonable.**

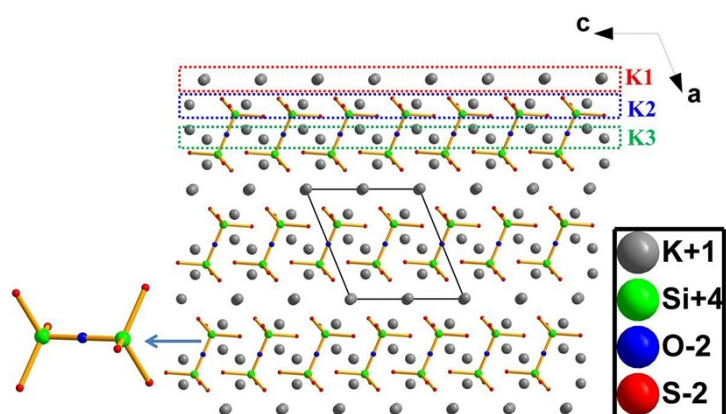

**Figure S1.** Crystal structure of  $\text{K}_6\text{Si}_2\text{S}_6\text{O}$ .

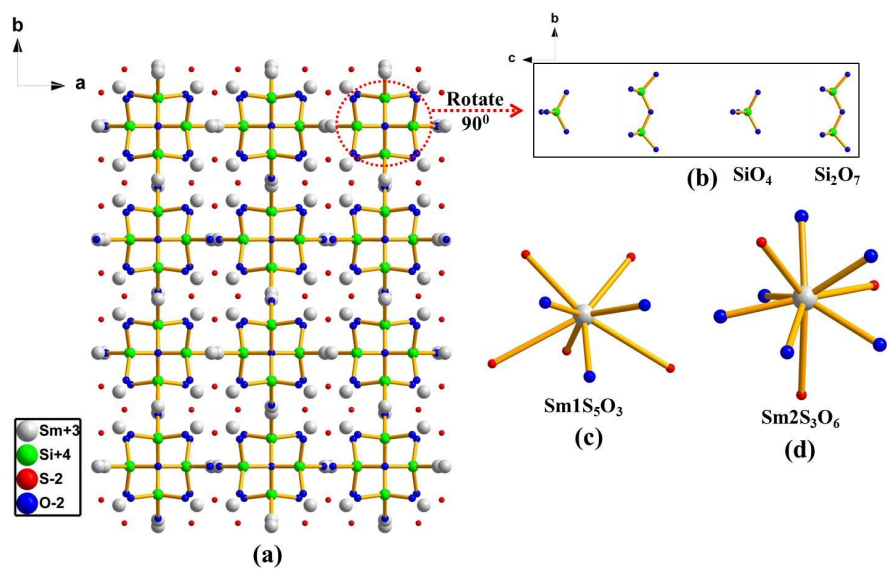

**Figure S2.** (a) Crystal structure of  $\text{Sm}_4\text{Si}_2\text{S}_3\text{O}_7$ ; (b) Isolated  $\text{SiO}_4$  and  $\text{Si}_2\text{O}_7$  units; (c) Coordination environment of  $\text{Sm1S}_5\text{O}_3$ ; (d) Coordination environment of  $\text{Sm2S}_3\text{O}_6$ .

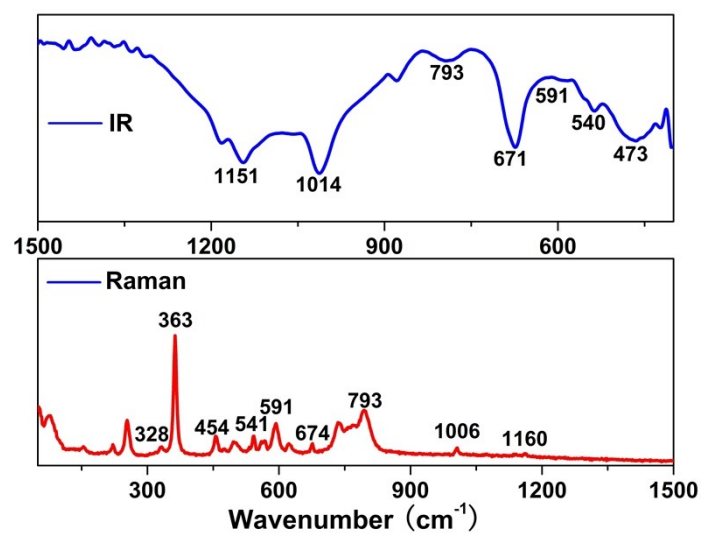

**Figure S3.** IR and Raman spectra of  $\text{Na}_6\text{Si}_3\text{S}_8\text{O}$ .



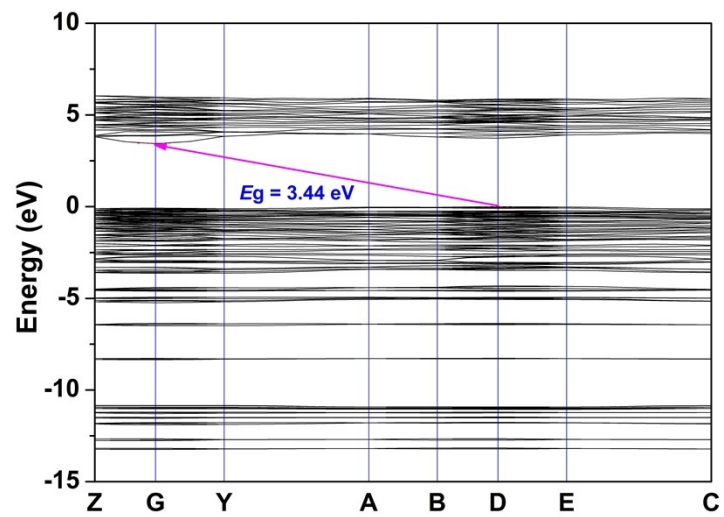

**Figure S4.** Band structure of  $\text{Na}_6\text{Si}_3\text{S}_8\text{O}$ .

## References

- 1 G. M. Sheldrick, *SHELXTL*, version 6.14, Bruker Analytical X-ray Instruments, Inc. Madison, WI, 2008.
- 2 A. L. Spek, *J. Appl. Crystallogr.* 2003, **36**, 7.
- 3 S. J. Clark, M. D. Segall, C. J. Pickard, P. J. Hasnip, M. J. Probert, K. Refson, and M. C. Payne, *Z. Kristallogr.* 2005, **220**, 567.
- 4 W. Kohn, and L. J. Sham, *Phys. Rev.* 1965, **140**, 1133.
- 5 J. P. Perdew, K. Burke, and M. Ernzerhof, *Phys. Rev. Lett.* 1996, **77**, 3865.
